# Supplementary material
Source: MDPI journal article supplement (https://www.mdpi.com/2073-4344/13/12/1492)
Supplement: s1 [file s1]

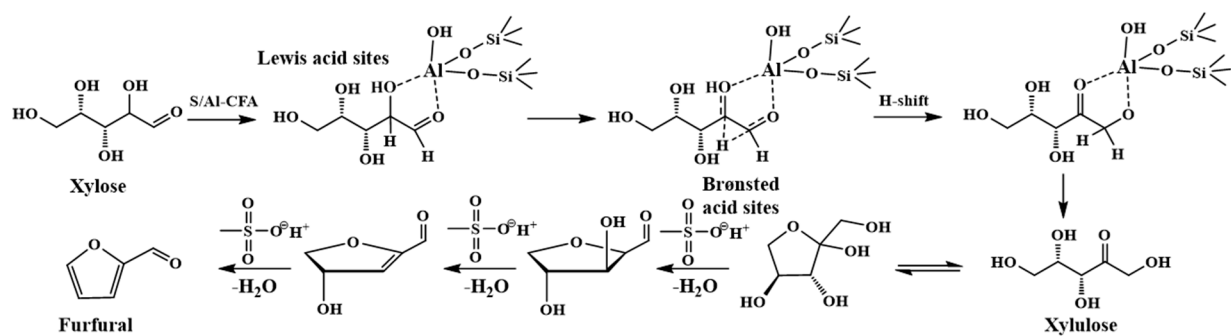

**Scheme S1.** Possible reaction pathways for furfural formation from xylose catalyzed by S-Al-CFA.

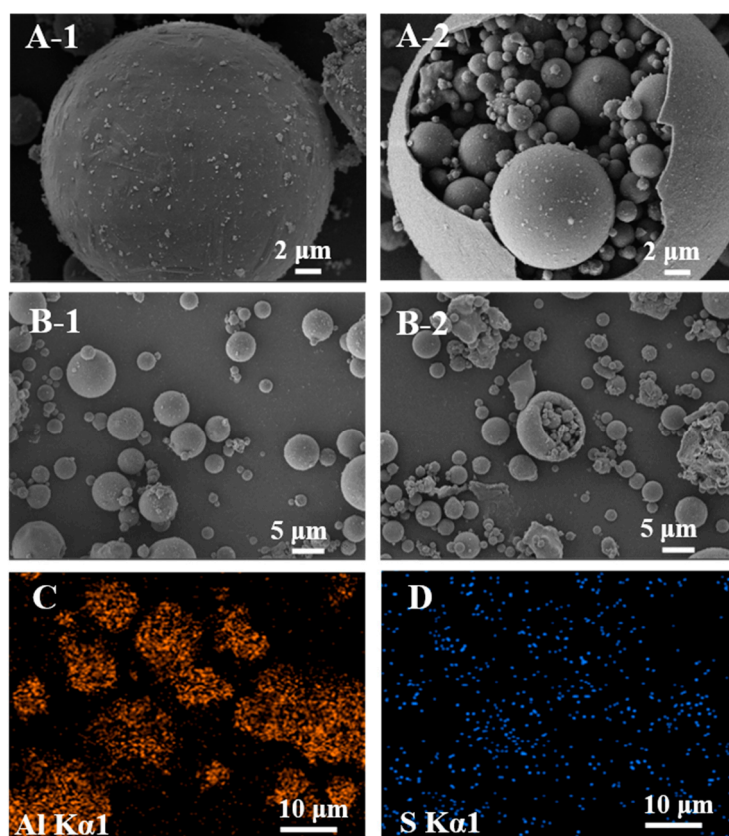

**Figure S1.** SEM images of the CFA (A-1 and B-1) and the S/Al-CFA (A-2 and B-2). Element maps of Al and S in the S/Al-CFA

(C and D).

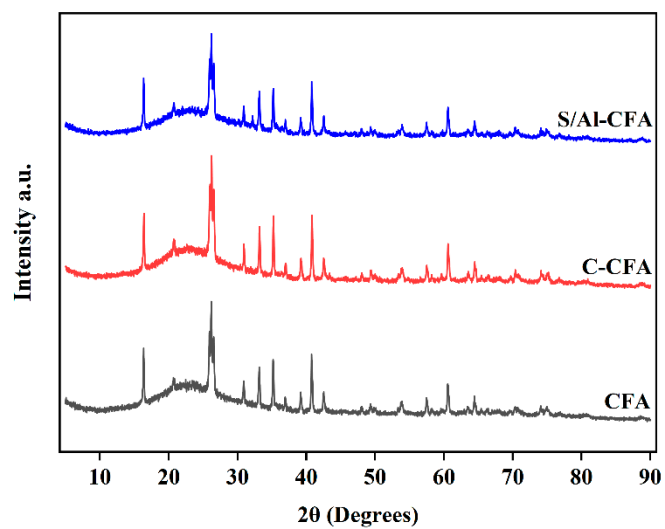

**Figure S2.** XRD patterns of the CFA, C-CFA, and S/Al-CFA.

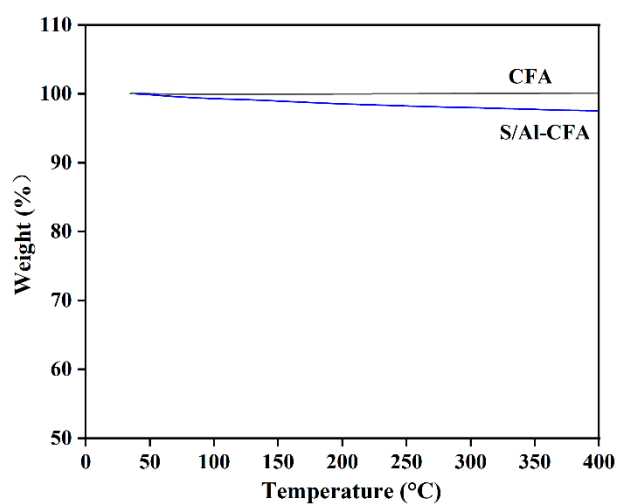

**Figure S3.** TG results for the CFA and S/Al-CFA.

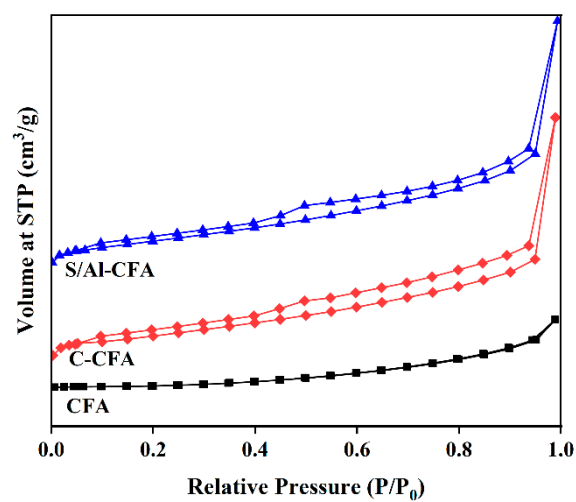

**Figure S4.** N<sub>2</sub> adsorption-desorption isotherms for CFA, C-CFA, and S/Al-CFA.

**Table S1.** The yield of furfural with different modified CFA catalysts.

|       | Fe-CFA | S/Fe-CFA | Cr-CFA | S/Cr-CFA | Al-CFA | S/Al-CFA |
|-------|--------|----------|--------|----------|--------|----------|
| 0 mM  | 38     | 59       | 38     | 59       | 38     | 59       |
| 5 mM  | 50     | 58       | 51     | 66       | 51     | 59       |
| 10 mM | 51     | 60       | 56     | 62       | 61     | 64       |
| 15 mM | 51     | 63       | 53     | 56       | 66     | 72       |
| 20 mM | 45     | 58       | 51     | 56       | 62     | 64       |

**Table S2** Element compositions of the catalysts determined by EDS.

| Elements | CFA<br>(wt %) | C-CFA<br>(wt %) | S/Al-CFA<br>(wt %) |
|----------|---------------|-----------------|--------------------|
| Si K     | 9.79          | 15.44           | 17.07              |
| Al K     | 7.85          | 6.56            | 8.96               |
| S K      | 0.14          | 0.23            | 1.35               |
| C K      | 45.38         | 34.82           | 38.91              |

**Table S3.** Comparison of the catalyst performance before and after the cycle.

| Catalyst | Weak acid<br>mmol·g <sup>-1</sup> | moderate acid<br>mmol·g <sup>-1</sup> | strong acid<br>mmol·g <sup>-1</sup> | Total acid<br>mmol·g <sup>-1</sup> |
|----------|-----------------------------------|---------------------------------------|-------------------------------------|------------------------------------|
| CFA      | 0.28                              | 1.86                                  | 1.42                                | 3.56                               |
| S/Al-CFA | 2.99                              | 14.73                                 | 6.18                                | 23.90                              |
